# Supplementary material
Source: Springer Nature journal article supplement (https://www.springermedizin.de/resource/supplementary/40885_2014_10_MOESM1_ESM.pdf/25787886)

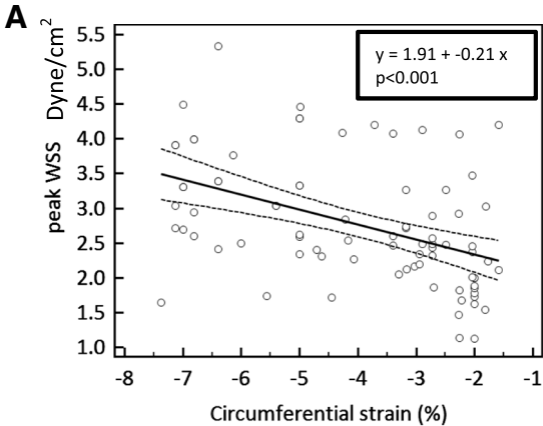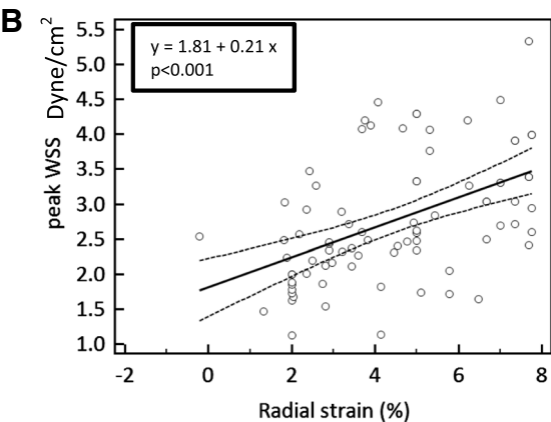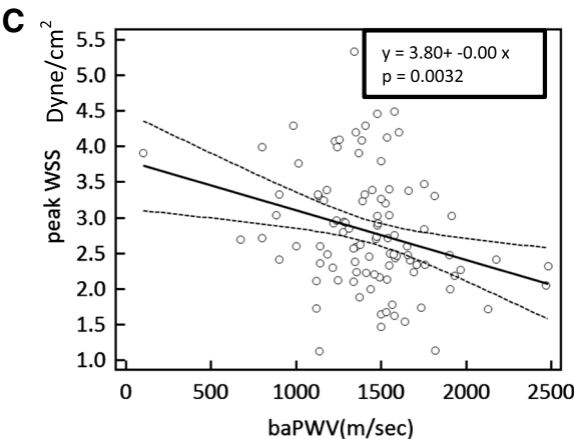

Supplement: MOESM1 [file 25787886]
